# Supplementary material
Source: publisher site journal article supplement (https://www.dovepress.com/get_supplementary_file.php?f=349210.docx)
Supplement: Supplementary file 1 [file get_supplementary_file.php]

| Clinicopathological  Characteristics | TCGA chort  (n=377) | ICGC chort  (n=260) |
| --- | --- | --- |
| Age(years) |  |  |
| <=65 | 235 | 98 |
| >65 | 141 | 162 |
| Unkown | 1 | 0 |
| Gender |  |  |
| Male | 255 | 192 |
| Female | 122 | 68 |
| Grade |  |  |
| Grade 1 | 55 | NA |
| Grade 2 | 180 | NA |
| Grade 3 | 124 | NA |
| Grade 4 | 13 | NA |
| Unkown | 5 | NA |
| Stage |  |  |
| StageI | 175 | 40 |
| StageII | 87 | 117 |
| StageIII | 86 | 80 |
| StageIV | 5 | 23 |
| Unkown | 24 | 0 |
| T classification |  |  |
| T1 | 185 | NA |
| T2 | 95 | NA |
| T3 | 81 | NA |
| T4 | 13 | NA |
| Unkown | 3 |  |
| M classification |  |  |
| M0 | 272 | NA |
| M1 | 4 | NA |
| Unkown | 101 | NA |
| N classification |  |  |
| N0 | 257 | NA |
| N1 | 4 | NA |
| Unkown | 116 | NA |
| Survival status |  |  |
| Alive | 249 | 214 |
| Deceased | 128 | 46 |

**Supplementary table 1:** clinical information of HCC patients in the TCGA cohort and the ICGC cohort.

**Abbreviation:** TCGA, The Cancer Genome Atlas; ICGC, the International Cancer Genome Consortium database; NA, not applicable.
